# Supplementary material for: Model Sensitivity and Use of the Comparative Finite Element Method in Mammalian Jaw Mechanics: Mandible Performance in the Gray Wolf
Source: PubMed Central journal article supplement (PMC3084775; doi:10.1371/journal.pone.0019171), 2011-04-29
Supplement: pone.0019171.s001.pdf [file pone.0019171.s001.pdf]

**Table S1. Models used in the sensitivity tests.** Models and their descriptions are available at Dryad Digital Repository: doi:10.5061/dryad.8961

| Test 1 models  | Test 2 models  | Test 3 models  | Test 4 models  | Test 5 models  | Test 6 models  | Test 7 models  |
|----------------|----------------|----------------|----------------|----------------|----------------|----------------|
| J20101210TSA08 | J20101213TSA18 | J20101214TSA25 | J20101214TSA23 | J20101213TSA13 | J20101213TSA13 | J20101215TSA39 |
| J20101112TSA01 | J20101213TSA17 | J20101214TSA24 | J20101214TSA26 | J20101215TSA31 | J20101215TSA36 | J20101215TSA40 |
| J20101208TSA03 | J20101213TSA16 | J20101213TSA19 | J20101214TSA27 | J20101215TSA32 | J20101215TSA37 | J20101215TSA41 |
| J20101209TSA04 | J20101213TSA15 | J20101213TSA20 | J20101213TSA13 | J20101215TSA33 | J20101215TSA38 | J20101215TSA42 |
| J20101209TSA05 | J20101213TSA14 | J20101213TSA13 | J20101214TSA28 | J20101215TSA34 |                | J20101215TSA43 |
| J20101209TSA07 | J20101213TSA13 | J20101213TSA21 | J20101214TSA29 | J20101215TSA35 |                | J20101215TSA44 |
| J20101208TSA02 | J20101209TSA04 | J20101214TSA22 | J20101214TSA30 |                |                |                |
| J20101209TSA06 | J20101213TSA12 | J20101214TSA23 |                |                |                |                |
|                | J20101213TSA11 |                |                |                |                |                |
|                | J20101213TSA10 |                |                |                |                |                |
|                | J20101213TSA09 |                |                |                |                |                |
