# Supplementary material for: Model Sensitivity and Use of the Comparative Finite Element Method in Mammalian Jaw Mechanics: Mandible Performance in the Gray Wolf
Source: PubMed Central journal article supplement (PMC3084775; doi:10.1371/journal.pone.0019171), 2011-04-29
Supplement: pone.0019171.s002.pdf [file pone.0019171.s002.pdf]

**Table S2. Data for sensitivity test 1: Number of tetrahedral elements.** Tet4, number of 4-noded tetrahedral elements; SE, strain energy.

| <b>Model</b>   | <b>Tet4</b> | <b>SE (J)</b> | <b>m1 (N)</b> | <b>workTMJ (N)</b> | <b>balTMJ (N)</b> | <b>Solution time (s)</b> |
|----------------|-------------|---------------|---------------|--------------------|-------------------|--------------------------|
| J20101210TSA08 | 101674      | 0.0203        | 278.97        | 234.67             | 275.72            | 20                       |
| J20101112TSA01 | 319447      | 0.0226        | 292.90        | 197.11             | 261.68            | 152                      |
| J20101208TSA03 | 336658      | 0.0274        | 296.26        | 192.59             | 276.81            | 150                      |
| J20101209TSA04 | 383319      | 0.0267        | 294.11        | 190.64             | 276.59            | 192                      |
| J20101209TSA05 | 704257      | 0.0288        | 296.30        | 180.04             | 284.73            | 609                      |
| J20101209TSA07 | 990796      | 0.0293        | 296.36        | 182.57             | 277.50            | 1242                     |
| J20101208TSA02 | 1249385     | 0.0325        | 307.58        | 179.02             | 271.64            | 3591                     |
| J20101209TSA06 | 1404279     | 0.0302        | 302.02        | 188.67             | 275.44            | 4114                     |
