# Supplementary material for: Model Sensitivity and Use of the Comparative Finite Element Method in Mammalian Jaw Mechanics: Mandible Performance in the Gray Wolf
Source: PubMed Central journal article supplement (PMC3084775; doi:10.1371/journal.pone.0019171), 2011-04-29
Supplement: pone.0019171.s003.pdf [file pone.0019171.s003.pdf]

**Table S3. Data for sensitivity test 2: balancing-working muscle ratios.**

| <b>Model</b>   | <b>Balancing%</b> | <b>SE (J)</b> | <b>m1 (N)</b> | <b>workTMJ (N)</b> | <b>balTMJ (N)</b> |
|----------------|-------------------|---------------|---------------|--------------------|-------------------|
| J20101213TSA18 | 0                 | 0.0401        | 296.74        | 486.91             | 30.75             |
| J20101213TSA17 | 0.1               | 0.0313        | 294.97        | 414.11             | 45.07             |
| J20101213TSA16 | 0.2               | 0.0267        | 294.04        | 353.69             | 106.58            |
| J20101213TSA15 | 0.3               | 0.0247        | 293.65        | 302.87             | 158.85            |
| J20101213TSA14 | 0.4               | 0.0244        | 293.61        | 259.64             | 203.69            |
| J20101213TSA13 | 0.5               | 0.0252        | 293.79        | 222.58             | 242.57            |
| J20101209TSA04 | 0.6               | 0.0267        | 294.11        | 190.64             | 276.59            |
| J20101213TSA12 | 0.7               | 0.0287        | 294.52        | 163.07             | 306.61            |
| J20101213TSA11 | 0.8               | 0.0309        | 294.98        | 139.32             | 333.29            |
| J20101213TSA10 | 0.9               | 0.0333        | 295.48        | 119.04             | 357.18            |
| J20101213TSA09 | 1                 | 0.0357        | 295.99        | 102.06             | 378.66            |
