# Supplementary material for: Model Sensitivity and Use of the Comparative Finite Element Method in Mammalian Jaw Mechanics: Mandible Performance in the Gray Wolf
Source: PubMed Central journal article supplement (PMC3084775; doi:10.1371/journal.pone.0019171), 2011-04-29
Supplement: pone.0019171.s004.pdf [file pone.0019171.s004.pdf]

**Table S4. Data for sensitivity test 3: musculature ratios.**

| <b>Model</b>   | <b>Musculature</b> | <b>SE (J)</b> | <b>m1 (N)</b> | <b>workTMJ (N)</b> | <b>balTMJ (N)</b> |
|----------------|--------------------|---------------|---------------|--------------------|-------------------|
| J20101214TSA25 | 0-0-100            | 0.0622        | 329.29        | 433.45             | 287.53            |
| J20101214TSA24 | 0-100-0            | 0.0314        | 218.84        | 394.82             | 255.06            |
| J20101213TSA19 | 50-35-15           | 0.023         | 289.81        | 216.55             | 236.55            |
| J20101213TSA20 | 55-30-15           | 0.0226        | 261.47        | 210.22             | 221.82            |
| J20101213TSA13 | 55-35-10           | 0.0252        | 293.79        | 222.58             | 242.57            |
| J20101213TSA21 | 60-25-15           | 0.0255        | 305.34        | 208.90             | 247.46            |
| J20101214TSA22 | 65-25-10           | 0.0282        | 310.10        | 222.08             | 256.10            |
| J20101214TSA23 | 100-0-0            | 0.0496        | 368.57        | 325.61             | 334.49            |
