# Supplementary material for: Model Sensitivity and Use of the Comparative Finite Element Method in Mammalian Jaw Mechanics: Mandible Performance in the Gray Wolf
Source: PubMed Central journal article supplement (PMC3084775; doi:10.1371/journal.pone.0019171), 2011-04-29
Supplement: pone.0019171.s005.pdf [file pone.0019171.s005.pdf]

**Table S5. Data for sensitivity test 4: number of muscle subgroups.**

| <b>Model</b>          | <b>Muscle groups</b> | <b>SE (J)</b> | <b>m1 (N)</b> | <b>workTMJ (N)</b> | <b>balTMJ (N)</b> |
|-----------------------|----------------------|---------------|---------------|--------------------|-------------------|
| <i>J20101214TSA23</i> | 1                    | 0.0496        | 368.57        | 325.61             | 334.49            |
| <i>J20101214TSA26</i> | 2                    | 0.0298        | 298.71        | 240.68             | 248.46            |
| <i>J20101214TSA27</i> | 3                    | 0.025         | 295.65        | 217.98             | 238.84            |
| <i>J20101213TSA13</i> | 4                    | 0.0252        | 293.79        | 222.58             | 242.57            |
| <i>J20101214TSA30</i> | 5                    | 0.0185        | 263.18        | 164.83             | 232.79            |
| <i>J20101214TSA29</i> | 6                    | 0.0188        | 252.06        | 165.40             | 214.86            |
| <i>J20101214TSA28</i> | 7                    | 0.0182        | 253.83        | 147.38             | 207.96            |

1 muscle: temporalis only

2 muscles: temporalis and masseter (no subgroups)

3 muscles: temporalis, masseter, and internal pterygoid

4 muscles: temporalis, masseter, zygomaticomandibularis, internal pterygoid

5 muscles: temporalis (superficial + deep), zygomatic part of temporalis, masseter, zygomaticomandibularis, internal pterygoid

6 muscles: superficial temporalis, deep temporalis, zygomatic temporalis, masseter, zygomaticomandibularis, internal pterygoid

7 muscles: superficial temporalis, deep temporalis, zygomatic temporalis, superficial masseter, deep masseter, zygomaticomandibularis, internal pterygoid
