# Supplementary material for: Model Sensitivity and Use of the Comparative Finite Element Method in Mammalian Jaw Mechanics: Mandible Performance in the Gray Wolf
Source: PubMed Central journal article supplement (PMC3084775; doi:10.1371/journal.pone.0019171), 2011-04-29
Supplement: pone.0019171.s006.pdf [file pone.0019171.s006.pdf]

**Table S6. Data for sensitivity test 5: bite point constraint. m1.ap**, anteroposterior component, **m1.dv**, dorsoventral component, **m1.lat**, lateral component.

| Model          | Bite point nodes | SE (J) | workTMJ (N) | baTMJ (N) | m1 (N) | m1.ap (N) | m1.dv (N) | m1.lat (N) |
|----------------|------------------|--------|-------------|-----------|--------|-----------|-----------|------------|
| J20101213TSA13 | 1                | 0.0252 | 222.58      | 242.57    | 293.79 | 42.81     | 269.46    | 108.95     |
| J20101215TSA31 | 7                | 0.0232 | 218.19      | 241.64    | 299.48 | 43.15     | 268.50    | 117.80     |
| J20101215TSA32 | 18               | 0.0225 | 214.80      | 237.85    | 321.37 | 41.37     | 269.18    | 127.13     |
| J20101215TSA33 | 30               | 0.0223 | 212.11      | 235.68    | 394.43 | 40.03     | 270.25    | 132.93     |
| J20101215TSA34 | 48               | 0.0218 | 210.51      | 228.69    | 417.16 | 36.15     | 272.80    | 141.73     |
| J20101215TSA35 | 66               | 0.0215 | 211.00      | 223.13    | 470.11 | 33.08     | 274.44    | 146.51     |
