# Supplementary material for: Model Sensitivity and Use of the Comparative Finite Element Method in Mammalian Jaw Mechanics: Mandible Performance in the Gray Wolf
Source: PubMed Central journal article supplement (PMC3084775; doi:10.1371/journal.pone.0019171), 2011-04-29
Supplement: pone.0019171.s007.pdf [file pone.0019171.s007.pdf]

**Table S7. Data for sensitivity test 6: temporomandibular joint constraints**

| Model          | TMJ      | SE (J) | workTMJ (N) | BalTMJ (N) | m1 (N) | workStrain ( $\mu$ E) | workStrain max ( $\mu$ E) | balStrain ( $\mu$ E) | balStrain max ( $\mu$ E) |
|----------------|----------|--------|-------------|------------|--------|-----------------------|---------------------------|----------------------|--------------------------|
| J20101213TSA13 | 1 node   | 0.0252 | 222.58      | 242.57     | 293.79 | 198                   | 821                       | 221                  | 722                      |
| J20101215TSA37 | 10 nodes | 0.0139 | 341.38      | 308.95     | 291.80 | 148                   | 244                       | 168                  | 261                      |
| J20101215TSA36 | 1 link   | 0.0269 | 0.00        | 0.00       | 275.95 | 122                   | 550                       | 371                  | 3000                     |
| J20101215TSA38 | 10 links | 0.0127 | 0.00        | 0.00       | 275.40 | 255                   | 725                       | 555                  | 1450                     |
