# Supplementary material for: Model Sensitivity and Use of the Comparative Finite Element Method in Mammalian Jaw Mechanics: Mandible Performance in the Gray Wolf
Source: PubMed Central journal article supplement (PMC3084775; doi:10.1371/journal.pone.0019171), 2011-04-29
Supplement: pone.0019171.s008.pdf [file pone.0019171.s008.pdf]

**Table S8. Data for sensitivity test 7: number of material properties**

| <b>Model</b>   | <b>Properties</b> | <b>SE (J)</b> | <b>m1 (N)</b> | <b>workTMJ (N)</b> | <b>balTMJ (N)</b> |
|----------------|-------------------|---------------|---------------|--------------------|-------------------|
| J20101215TSA39 | 1                 | 0.0241        | 293.79        | 222.58             | 242.57            |
| J20101215TSA40 | 3                 | 0.0242        | 293.71        | 222.76             | 242.55            |
| J20101215TSA41 | 4                 | 0.1192        | 327.72        | 192.76             | 219.20            |
| J20101215TSA42 | 6                 | 0.4922        | 403.97        | 180.69             | 183.75            |
| J20101215TSA44 | 8                 | 0.488         | 405.83        | 180.65             | 182.98            |
| J20101215TSA43 | 10                | 0.3527        | 388.16        | 181.44             | 189.57            |
