# Supplementary material for: Model Sensitivity and Use of the Comparative Finite Element Method in Mammalian Jaw Mechanics: Mandible Performance in the Gray Wolf
Source: PubMed Central journal article supplement (PMC3084775; doi:10.1371/journal.pone.0019171), 2011-04-29
Supplement: pone.0019171.s009.pdf [file pone.0019171.s009.pdf]

**Table S9. Material properties used in sensitivity test 7.** HU, Hounsfield Units; E, elastic (Young’s) modulus;  $\nu$ , Poisson ratio. Material properties of bone were derived from the regression equation of Schneider et al. (1996): Density ( $\text{g/cm}^3$ ) =  $0.0007 \cdot \text{HU} + 0.3489$ ,  $R^2 = 0.9994$ , and modulus values were calculated from the regression equation of Rho et al. (1995) as  $E \text{ (GPa)} = 5.05 \cdot \rho^{1.269}$  for  $\rho < 1 \text{ g/cm}^3$  and  $E \text{ (GPa)} = 9.11 \cdot \rho^{1.326}$  for  $\rho > 1 \text{ g/cm}^3$ . The lowest density material was arbitrarily assigned  $\rho=0.01 \text{ g/cm}^3$  as a low-end value.

| Mean HU | 10 properties               |         | 8 properties                |         | 6 properties                |         | 4 properties                |         | 3 properties |         | 1 property |         |
|---------|-----------------------------|---------|-----------------------------|---------|-----------------------------|---------|-----------------------------|---------|--------------|---------|------------|---------|
|         | Density ( $\text{g/cm}^3$ ) | E (GPa) | Density ( $\text{g/cm}^3$ ) | E (GPa) | Density ( $\text{g/cm}^3$ ) | E (GPa) | Density ( $\text{g/cm}^3$ ) | E (GPa) | $\nu$        | E (GPa) | $\nu$      | E (GPa) |
| -820.75 | 0.01                        | 0.01    | 0.03                        | 0.08    | 0.03                        | 0.08    | 0.26                        | 1.07    | 0.30         | 20.00   | 0.30       | 20.00   |
| -413.75 | 0.06                        | 0.14    | 0.03                        | 0.08    | 0.03                        | 0.08    | 0.26                        | 1.07    | 0.30         | 20.00   | 0.30       | 20.00   |
| -6.75   | 0.34                        | 1.30    | 0.49                        | 2.05    | 0.49                        | 2.05    | 0.26                        | 1.07    | 0.30         | 20.00   | 0.30       | 20.00   |
| 400.25  | 0.63                        | 2.80    | 0.49                        | 2.05    | 0.49                        | 2.05    | 0.26                        | 1.07    | 0.30         | 20.00   | 0.30       | 20.00   |
| 807.25  | 0.91                        | 4.51    | 0.91                        | 4.51    | 1.06                        | 8.05    | 1.34                        | 12.71   | 0.30         | 20.00   | 0.30       | 20.00   |
| 1214.25 | 1.20                        | 11.59   | 1.20                        | 11.59   | 1.06                        | 8.05    | 1.34                        | 12.71   | 0.30         | 20.00   | 0.30       | 20.00   |
| 1621.25 | 1.48                        | 15.37   | 1.48                        | 15.37   | 1.63                        | 17.38   | 1.34                        | 12.71   | 0.30         | 20.00   | 0.30       | 20.00   |
| 2026.5  | 1.77                        | 19.39   | 1.77                        | 19.39   | 1.63                        | 17.38   | 1.34                        | 12.71   | 0.30         | 20.00   | 0.30       | 20.00   |
| Dentine | ( $\nu = 0.18$ )            | 18.80   | ( $\nu = 0.18$ )            | 18.80   | ( $\nu = 0.18$ )            | 18.80   | ( $\nu = 0.18$ )            | 18.80   | 0.18         | 18.80   | 0.30       | 20.00   |
| Enamel  | ( $\nu = 0.30$ )            | 80.10   | ( $\nu = 0.30$ )            | 80.10   | ( $\nu = 0.30$ )            | 80.10   | ( $\nu = 0.30$ )            | 80.10   | 0.30         | 80.10   | 0.30       | 20.00   |
